# Supplementary material for: Quantification of in vivo progenitor mutation accrual with ultra-low error rate and minimal input DNA using SIP-HAVA-seq
Source: PubMed Central journal article supplement — Genome Res. 2016 Nov;26(11):1600–11. doi: 10.1101/gr.200501.115 (PMC5088601; doi:10.1101/gr.200501.115), 2016-11
Supplement: supp_gr.200501.115_Supplemental_Fig_S14.pdf [file supp_gr.200501.115_Supplemental_Fig_S14.pdf]

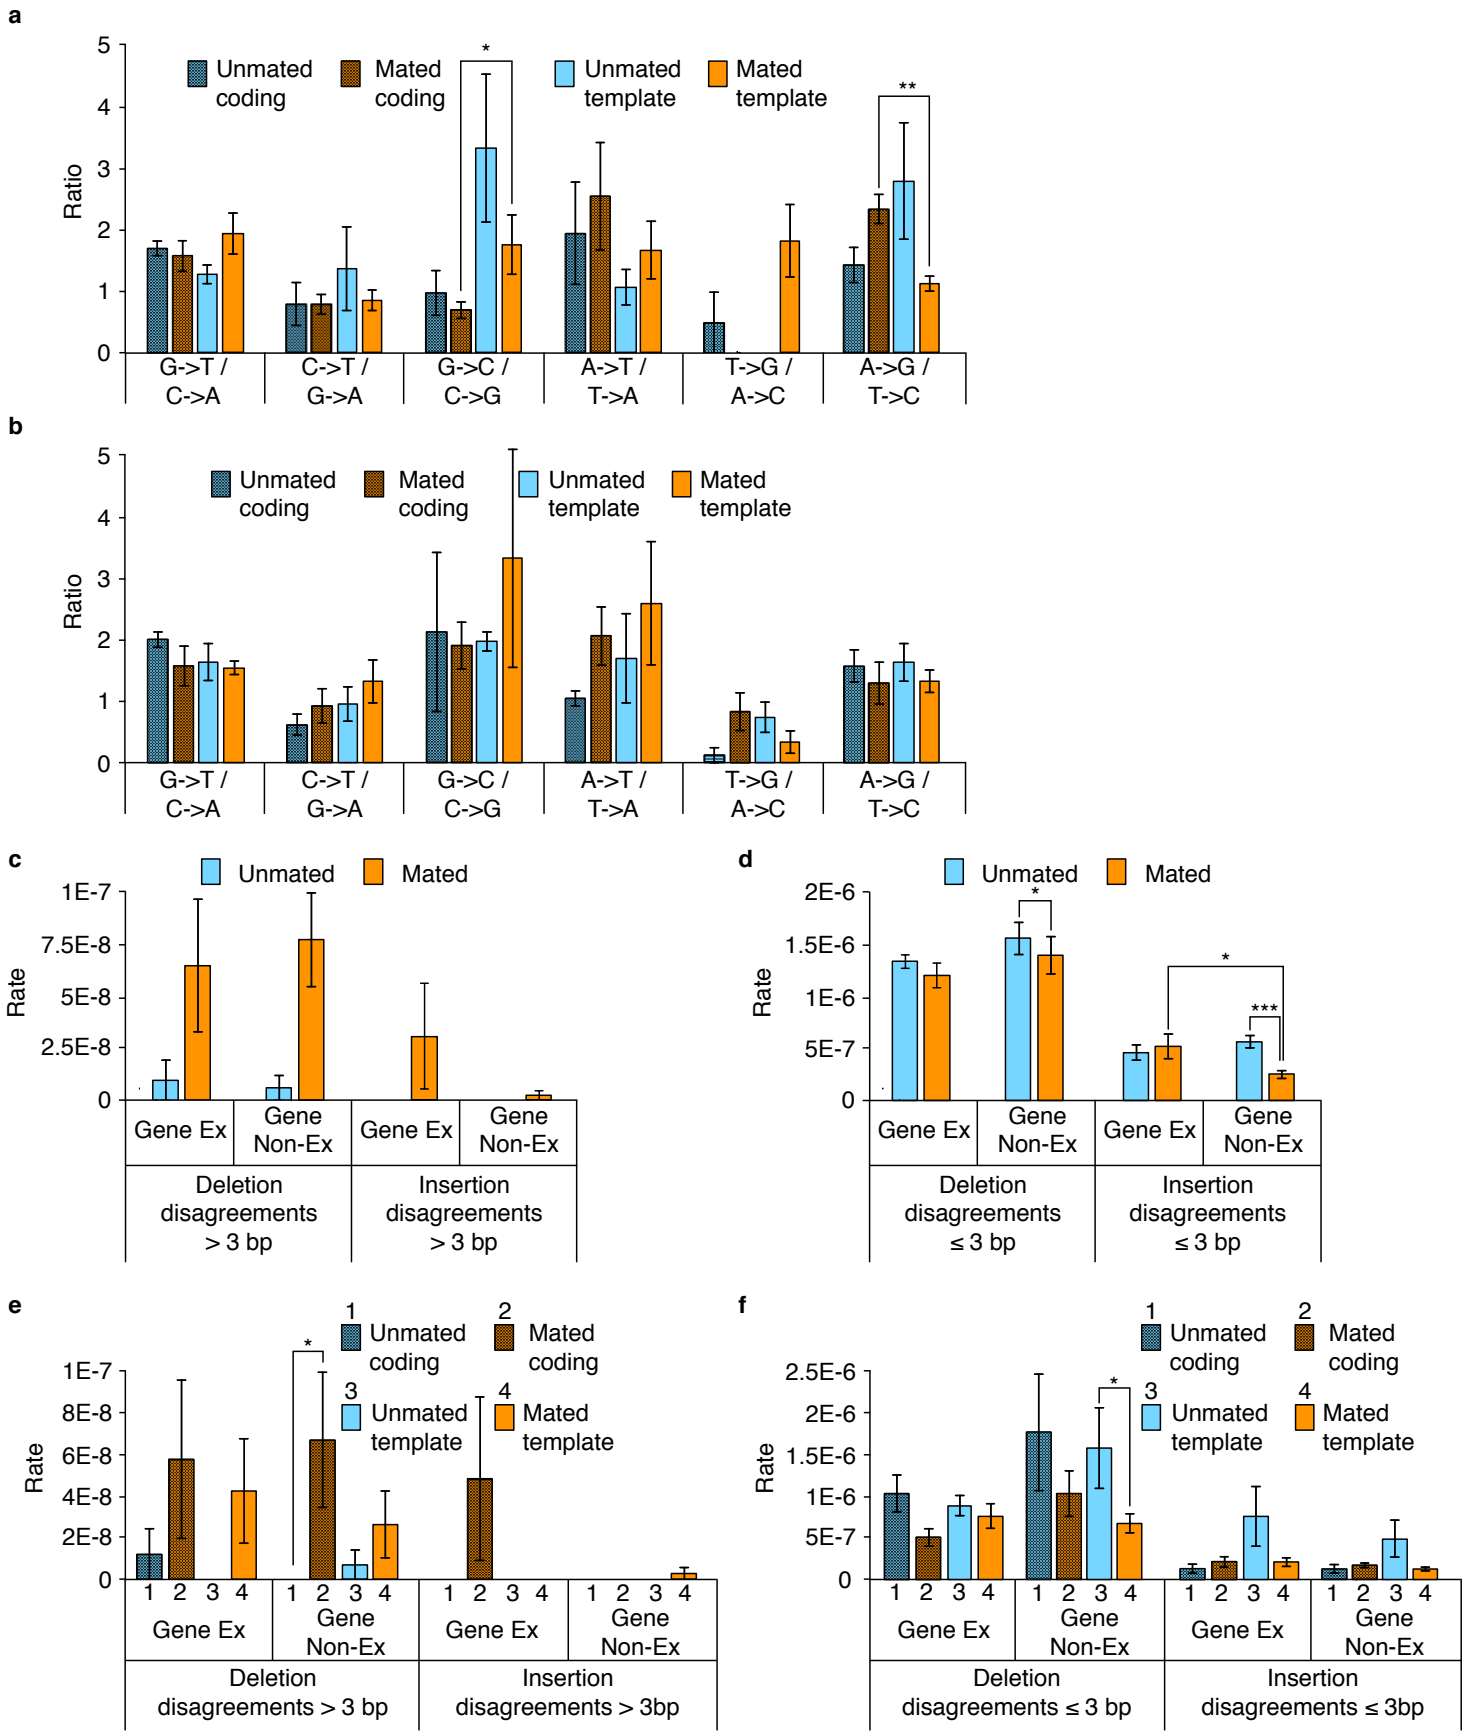

**Supplemental Fig S14. Breakdown of duplex disagreement ratios or rates as a function of thresholded gene expression status, strand type, and by disagreement length.**

(a-b) Ratios between each kind of duplex substitution disagreement and its reciprocal for expressed (a) or non-expressed (b) genes. (c-f) Duplex deletion or insertion disagreement rates broken down by gene expression for disagreements longer than 3 bp (c, e) or no longer than 3 bp (d, f), and by strand type (e-f). Error bars and confidence intervals as in Supplemental Fig S12.
