# Supplementary material for: Quantification of in vivo progenitor mutation accrual with ultra-low error rate and minimal input DNA using SIP-HAVA-seq
Source: PubMed Central journal article supplement — Genome Res. 2016 Nov;26(11):1600–11. doi: 10.1101/gr.200501.115 (PMC5088601; doi:10.1101/gr.200501.115), 2016-11
Supplement: supp_gr.200501.115_Supplemental_Fig_S15.pdf [file supp_gr.200501.115_Supplemental_Fig_S15.pdf]

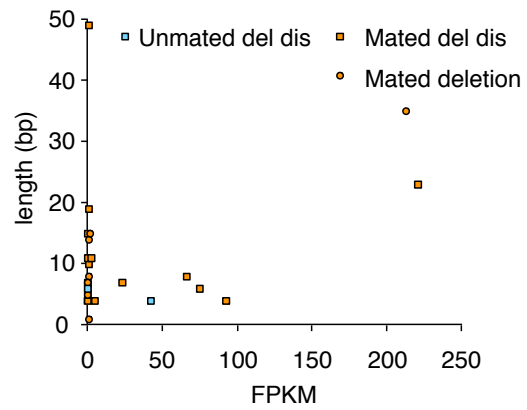

**Supplemental Fig S15. Gene duplex deletion disagreements longer than 3 bp and all deletion mutation lengths as a function of gene expression levels and mating status.**
