# Supplementary material for: Quantification of in vivo progenitor mutation accrual with ultra-low error rate and minimal input DNA using SIP-HAVA-seq
Source: PubMed Central journal article supplement — Genome Res. 2016 Nov;26(11):1600–11. doi: 10.1101/gr.200501.115 (PMC5088601; doi:10.1101/gr.200501.115), 2016-11
Supplement: supp_gr.200501.115_Supplemental_Fig_S19.pdf [file supp_gr.200501.115_Supplemental_Fig_S19.pdf]

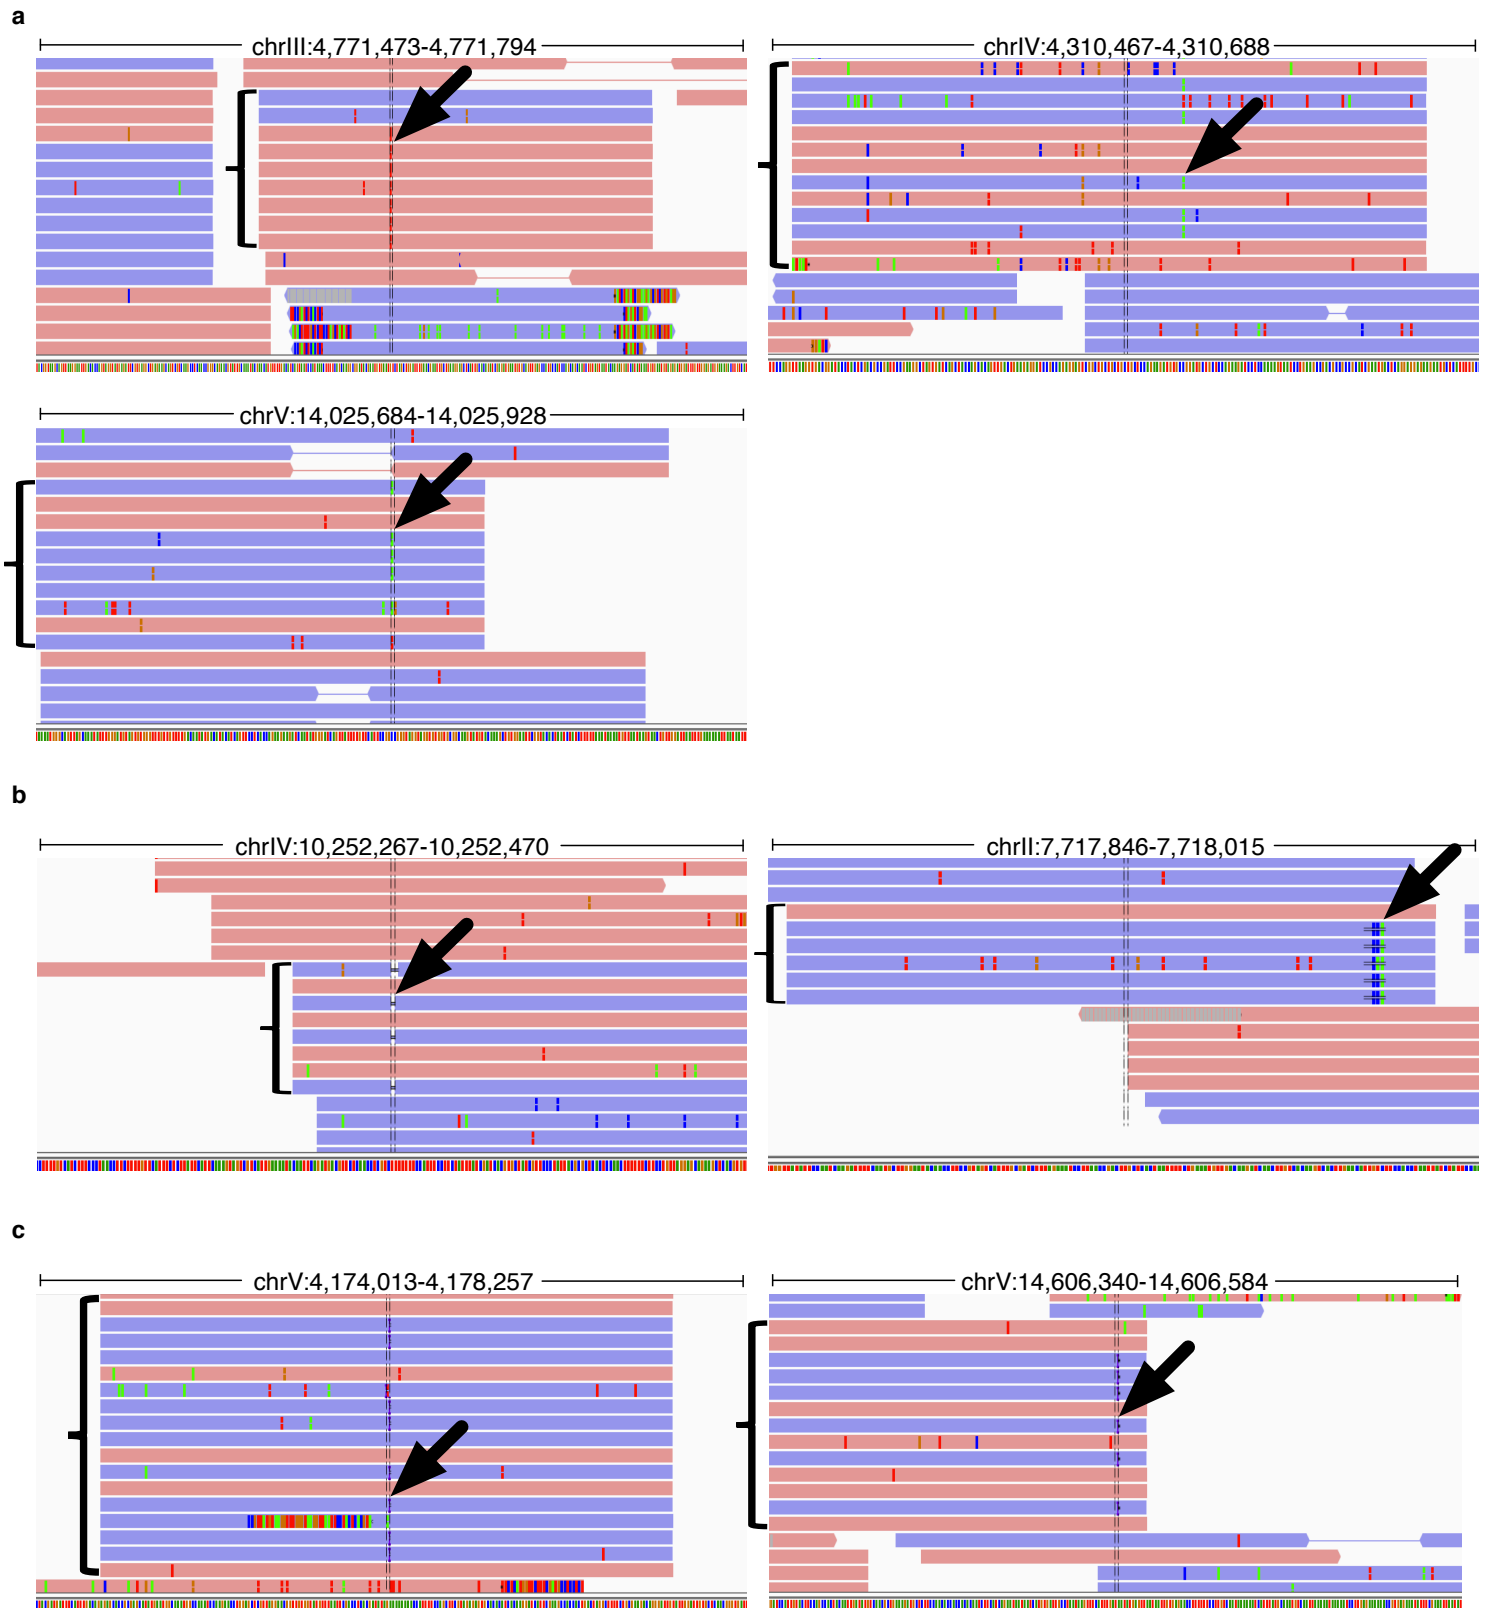

**Supplemental Fig S19. Examples of false-positive detections by VarScan 2, MuTect 1 or MuTect 2.** Representative examples of duplex disagreements leading to false-positive detection of substitutions (a), deletions (b), or insertions (c) by VarScan 2, MuTect 1 or MuTect 2; braces highlight reads belonging to duplex of interest (colored in red or blue for first or second of pair reads, which corresponds to top or bottom duplex strands), and arrows show positions of duplex disagreements.
