# Supplementary material for: Quantification of in vivo progenitor mutation accrual with ultra-low error rate and minimal input DNA using SIP-HAVA-seq
Source: PubMed Central journal article supplement — Genome Res. 2016 Nov;26(11):1600–11. doi: 10.1101/gr.200501.115 (PMC5088601; doi:10.1101/gr.200501.115), 2016-11
Supplement: supp_gr.200501.115_Supplemental_Fig_S20.pdf [file supp_gr.200501.115_Supplemental_Fig_S20.pdf]

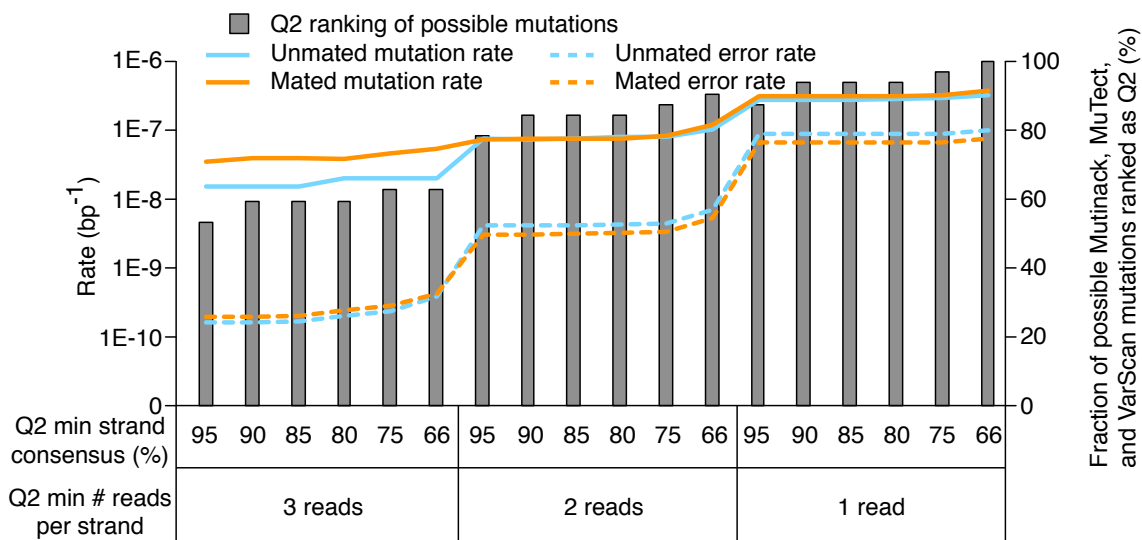

**Supplemental Fig S20. Dependence of apparent mutation and technical error rates on Q2 duplex strand thresholds.**

Both the apparent mutation rate (based on the number of Q2 mutations and Q2 coverage) and the technical error rate overall increase as one decreases the Q2 thresholds for the minimum number of reads per duplex strand and for the strand consensus. Lines indicate apparent mutation and technical error rates (left y-axis), while bars indicate the number of mutations ranked as Q2, as a fraction of the total number of mutations that are 1) detected by VarScan 2, MuTect 1 or MuTect 2 and appear not to stem from a duplex disagreement (see main text) or 2) detected by Mutinack at the most lenient setting levels used for this Figure. Mutinack settings used for analyses reported in other Figs are at the left end of the x-axis.
