# Supplementary material for: Quantification of in vivo progenitor mutation accrual with ultra-low error rate and minimal input DNA using SIP-HAVA-seq
Source: PubMed Central journal article supplement — Genome Res. 2016 Nov;26(11):1600–11. doi: 10.1101/gr.200501.115 (PMC5088601; doi:10.1101/gr.200501.115), 2016-11
Supplement: supp_gr.200501.115_Supplemental_Fig_S21.pdf [file supp_gr.200501.115_Supplemental_Fig_S21.pdf]

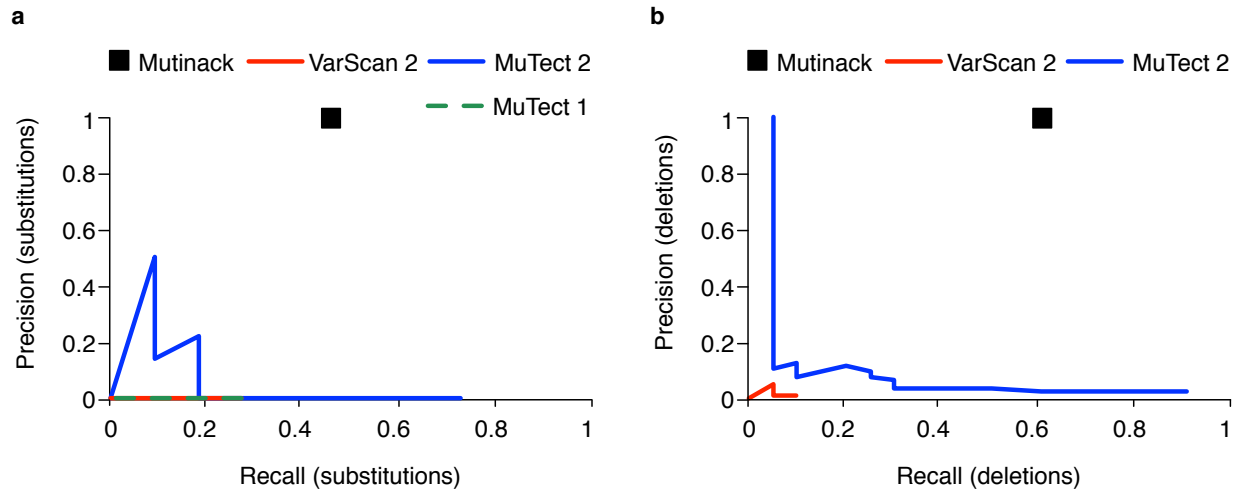

**Supplemental Fig 21. Precision-recall curves scoring mutation detection.**

Precision-recall curves for substitution (a) and deletion (b) detection; see main text for details. Precision and recall are defined as  $TP / (TP + FP)$  and  $TP / (TP + FN)$ , with TP: true positives, FP: false positives, FN: false negatives. See main text for approximation of the “ground truth” used for this comparison.
