# Supplementary material for: Quantification of in vivo progenitor mutation accrual with ultra-low error rate and minimal input DNA using SIP-HAVA-seq
Source: PubMed Central journal article supplement — Genome Res. 2016 Nov;26(11):1600–11. doi: 10.1101/gr.200501.115 (PMC5088601; doi:10.1101/gr.200501.115), 2016-11
Supplement: supp_gr.200501.115_Supplemental_Table_S4.pdf [file supp_gr.200501.115_Supplemental_Table_S4.pdf]

| Base  | Duplex Del. Disag | Duplex Ins. Disag | Raw Del. Q2     | Raw Ins. Q2     | Raw Del. Q1     | Raw Ins. Q1     |
|-------|-------------------|-------------------|-----------------|-----------------|-----------------|-----------------|
| A     | 355 [34.6%]       | 169 [41.8%]       | 357,951 [29.4%] | 220,689 [27.3%] | 930,312 [31.8%] | 640,391 [30.1%] |
| C     | 80 [7.8%]         | 9 [2.2%]          | 147,790 [12.1%] | 157,889 [19.5%] | 358,265 [12.2%] | 376,633 [17.7%] |
| G     | 63 [6.1%]         | 11 [2.7%]         | 157,193 [12.9%] | 162,003 [20.0%] | 361,896 [12.4%] | 379,697 [17.9%] |
| T     | 387 [37.7%]       | 186 [46.0%]       | 405,071 [33.2%] | 199,515 [24.6%] | 887,434 [30.3%] | 466,735 [22.0%] |
| Other | 142 [13.8%]       | 29 [7.2%]         | 150,396 [12.3%] | 69,760 [8.6%]   | 387,686 [13.3%] | 261,494 [12.3%] |

**Supplemental Table S4. Deletion and insertion disagreement spectra.**

Numerical data for data presented in Fig 2b-c. Both frequency and proportion are shown. Disagreements longer than 1 bp are grouped under "> 1 bp".
