# Supplementary material for: Quantification of in vivo progenitor mutation accrual with ultra-low error rate and minimal input DNA using SIP-HAVA-seq
Source: PubMed Central journal article supplement — Genome Res. 2016 Nov;26(11):1600–11. doi: 10.1101/gr.200501.115 (PMC5088601; doi:10.1101/gr.200501.115), 2016-11
Supplement: supp_gr.200501.115_Supplemental_Table_S5.pdf [file supp_gr.200501.115_Supplemental_Table_S5.pdf]

| Genome location   | Mating status | Gene name     | Location    | Sequence context                                                                        | Micro-homology | Base repeat | Single-nucleotide micro-homology |
|-------------------|---------------|---------------|-------------|-----------------------------------------------------------------------------------------|----------------|-------------|----------------------------------|
| chrV:14,897,511   | Mated         | H12D21.6      | Exon 1/1    | gtcagcttc <b>CGGC</b> atgggatcaa                                                        | No             | No          | No                               |
| chrX:7,728,037    | Mated         | <i>vit-1</i>  | Exon 1/5    | attcaagctg <b>TCGA</b> tgaccgtcac                                                       | No             | No          | No                               |
| chrV:16,812,816   | Mated         | <i>cand-1</i> | Exon 11/12  | acttgaccct <b>CAA</b> cggtgcgtaa                                                        | No             | No          | No                               |
| chrIV:4,162,865   | Mated         | <i>scrm-5</i> | Exon 2/4    | tccaatgcat <b>CAA</b> cccctcgaga                                                        | No             | No          | No                               |
| chrIII:5,078,650  | Mated         | <i>alh-1</i>  | Exon 2/6    | agatgtcaat <b>ATCGCTGTCAA</b> <b>GGTTTAAATCTA</b><br>aattcgaatt                         | No             | No          | No                               |
| chrII:193,453     | Mated         | <i>abu-11</i> | Exon 3/4    | aattcgaatt acaatctt <b>TGGC</b> actgttgctg                                              | No             | No          | No                               |
| chrV:8,602,377    | Mated         | F41E6.15      | Exon 3/4    | tcagatacc <b>aTACT</b> actcgtatta                                                       | No             | No          | Yes                              |
| chrIII:12,174,671 | Mated         | <i>gly-11</i> | Exon 3/5    | ccaattgaca <b>CCGCCTG</b> tgcaaacagg                                                    | No             | No          | No                               |
| chrV:308,725      | Mated         | <i>phf-10</i> | Exon 4/6    | atagaggt <b>gGATGACTCg</b> atgacggtt                                                    | Yes            | No          | Yes                              |
| chrV:18,174,058   | Mated         | C31G12.4      | Exon 5/5    | <u>gaagaaga<b>gAAGAAG</b>g</u> tggtgtgga                                                | Yes            | No          | Yes                              |
| chrII:11,672,971  | Mated         | <i>trr-1</i>  | Exon 6/22   | atcgcacaca <b>CCAGTGG</b> atccatcaga                                                    | No             | No          | Yes                              |
| chrII:1,229,038   | Mated         | F53A10.2      | Exon 8/11   | caaccccatc <b>GATTTTCAAGCGAGGCCAA</b><br><u>gattcagaa</u>                               | Yes            | No          | No                               |
| chrI:10,715,469   | Unmated       | B0205.1       | Exon 8/13   | atatagaat <b>gAATGg</b> aactgatat                                                       | Yes            | No          | Yes                              |
| chrI:175,824      | Mated         | F56C11.6      | Exon 9/9    | cggtccgcca <b>TTTCAAGATT</b> gatctggacg                                                 | No             | No          | No                               |
| chrII:8,880,431   | Mated         | <i>rha-1</i>  | Exon10/15   | taccactcaa <b>TCGGCT</b> gtgatgcttc                                                     | No             | No          | No                               |
| chrV:16,472,301   | Mated         | <i>srw-35</i> | Intron 1/3  | tgggaaaata <b>ATACA</b> ttgaagcat                                                       | No             | No          | No                               |
| chrII:12,538,816  | Unmated       | F49C5.4       | Intron 1/8  | ttattcgat <b>TACGCT</b> actactcggc                                                      | No             | No          | No                               |
| chrX:2,158,009    | Mated         | F14D1.2       | Intron 2/2  | attcgctatc <b>ATAATACGACTGCTATCAAACGTA</b><br><b>CATAATCATTTAGCCTCCGCGGAA</b> tttcaaggg | No             | No          | No                               |
| chrX:8,805,105    | Mated         | R04E5.8       | Intron 3/7  | tgaaggagta <b>GAAAGGATATA</b> tgattttgc                                                 | No             | No          | No                               |
| chrII:13,586,529  | Mated         | Y47H9C.20     | Intron 4/5  | gcctgaagg <b>CGGCCTACACCTACC</b> tccttaggc                                              | No             | No          | No                               |
| chrII:12,838,584  | Mated         | <i>lgc-35</i> | Intron 5/11 | tccacgtgat <b>GTCAGCCTGAC</b> gccaggctgt                                                | No             | No          | No                               |
| chrII:14,290,194  | Mated         | N/A           |             | cgaaaatgga <b>CTCGTCGGATATATTACACTA</b><br><b>TTTT</b> ctccgttcaa                       | No             | No          | No                               |
| chrIV:14,941,896  | Mated         | N/A           |             | tcgcaacccc <b>AGAA</b> actaaaaaaa                                                       | No             | No          | No                               |
| chrIV:299,356     | Unmated       | N/A           |             | <u>tttttgt<b>TTTTTG</b>tttaattg</u>                                                     | Yes            | Yes         | Yes                              |
| chrV:6,231,794    | Mated         | N/A           |             | gataagagt <b>AATTTT</b> tagcttgaat                                                      | No             | No          | Yes                              |
| chrX:14,534,379   | Mated         | N/A           |             | tctctctac <b>TCTT</b> tcttctct                                                          | Yes            | No          | No                               |
| chrX:475,688      | Mated         | N/A           |             | ctcctttcc <b>AAA</b> CTTgacgattga                                                       | No             | No          | No                               |
| chrX:9,780,202    | Mated         | N/A           |             | gtgacgttt <b>TGTTGATAATCTGA</b> attgataaaa                                              | No             | No          | No                               |
| chrIV:1,459,836   | Mated         | ZC123.10      | Intron 7/8  | gatcgagcga <b>TGTAGATCC</b> ggtgtaaaaa                                                  | No             | No          | No                               |

| Genome location   | Mating status | Gene name     | Location   | Sequence context                                 | Micro-homology | Base repeat | Single-nucleotide micro-homology |
|-------------------|---------------|---------------|------------|--------------------------------------------------|----------------|-------------|----------------------------------|
| chrI:14,226,326   | Mated         | <i>eya-1</i>  | Intron 1/6 | gctcacagag <u>CACA</u> <u>cacacacac</u>          | Yes            | No          | No                               |
| chrI:1,874,486    | Unmated       | <i>tub-2</i>  | Exon 1/6   | ttgacgccTCGATCGTTGACGAGTTCCAC<br>GGACCaccgatcgtc | No             | No          | No                               |
| chrI:5,379,904    | Unmated       | <i>pqn-44</i> | Intron 1/6 | aatacactcg <u>TTGT</u> <u>ttgtt</u>              | Yes            | No          | No                               |
| chrIII:5,039,463  | Unmated       | C45G9.6       | Exon 7/9   | taagtcacctGTCCTGATATACAATccgaatgata              | No             | No          | No                               |
| chrIII:7,492,420  | Mated         | N/A           |            | ggcaggcaggCCCTGGAACCTGACTgcccaggagc              | No             | No          | Yes                              |
| chrIII:9,127,721  | Unmated       | <i>sec-16</i> | Exon 7/14  | cactcaattcCGTTCGTCTCTACATccaacgacaa              | No             | No          | Yes                              |
| chrIV:3,295,342   | Unmated       | W08E12.7      | Exon 2/5   | cgccaacattAAGGaaggagccat                         | Yes            | No          | No                               |
| chrV:19,666,563   | Mated         | N/A           |            | cctc <u>ttttt</u> <u>TTTT</u> cactggcagt         | Yes            | Yes         | Yes*                             |
| chrV:4,937,761    | Mated         | <i>catp-2</i> | Exon 8/9   | atgataccccTAAAGCAATCAAAGCTTG<br>taaagcagct       | Yes            | No          | No                               |
| chrV:6,631,259    | Mated         | N/A           |            | gtatgttgaAGTTCAATagttcaatag                      | Yes            | No          | Yes                              |
| chrV:9,921,378    | Mated         | <i>ceh-75</i> | Exon 1/4   | ctgtgacaaAATTaaggcctca                           | No             | No          | Yes                              |
| chrX:10,570,041   | Mated         | <i>bet-2</i>  | Intron 1/8 | catcgacaggTTCCTGagaaaaataa                       | No             | No          | No                               |
| chrX:11,607,836   | Mated         | N/A           |            | aacc <u>ttttt</u> <u>TTTT</u> agtaaaacta         | Yes            | Yes         | Yes*                             |
| chrX:17,622,725   | Mated         | N/A           |            | tccccctccCCTTCTcccaactcc                         | Yes            | No          | No                               |
| chrX:7,898,506    | Mated         | N/A           |            | tattaatctCCCTAactgttacc                          | No             | No          | Yes                              |
| chrII:13,586,529* | Mated         | Y47H9C.20     | Intron 4/5 | gcctgaaggCGGCCTACACCTACCgccttaggc                | No             | No          | No                               |
| chrV:6,231,794*   | Mated         | N/A           |            | tctctctacTCTTtcttctct                            | Yes            | No          | No                               |
| chrX:475,688*     | Mated         | N/A           |            | gtgacgtttTGTGATAATCTGAattgataaaa                 | No             | No          | No                               |

**Supplemental Table S5. Genome context of duplex deletion disagreements longer than 3 bp.**

Deletion disagreements: red; microhomology (defined as a sequence repeat 5 bp or longer within 10 bp of deletion disagreement; Sharma et al. 2015): solid underline; single-nucleotide microhomology (defined as identical single base on both sides of the deletion disagreement): blue; homopolymers (defined as at least 7 consecutive identical bases that cover the deletion disagreement): dashed underline. The two segments of the table correspond to strand consensus thresholds of 0.95 (top segment) or 0.51 (bottom segment). For Supplemental Tables S5-8, an asterisk in "Genome location" column indicates that the same disagreement is found at the same location in two or more samples; an asterisk in the "Single-nucleotide microhomology" column indicates that the deletion disagreement occurs within a homopolymer stretch, and that the exact position is thus ambiguous; since all internal positions would show single-nucleotide microhomology, these disagreements are scored as positive for that microhomology.
