# Supplementary material for: Quantification of in vivo progenitor mutation accrual with ultra-low error rate and minimal input DNA using SIP-HAVA-seq
Source: PubMed Central journal article supplement — Genome Res. 2016 Nov;26(11):1600–11. doi: 10.1101/gr.200501.115 (PMC5088601; doi:10.1101/gr.200501.115), 2016-11
Supplement: supp_gr.200501.115_Supplemental_Table_S8.pdf [file supp_gr.200501.115_Supplemental_Table_S8.pdf]

| Genome location   | Mating status | Gene name       | Location     | Sequence context                       | Micro-homology | Base repeat | Single-nucleotide micro-homology |
|-------------------|---------------|-----------------|--------------|----------------------------------------|----------------|-------------|----------------------------------|
| chrI:10,688,343   | Random        | <i>tag-272</i>  | Exon 1/3     | tcgctgggat <b>TCCTAAA</b> aatttcagag   | No             | No          | No                               |
| chrI:11,679,992   | Random        | <i>kpc-1</i>    | Exon 5/7     | taaggtgtct <b>TATGTGG</b> agcacgtgca   | No             | No          | No                               |
| chrI:5,252,722    | Random        | <i>let-363</i>  | Exon 16/32   | ttgctaacg <b>AGCACAA</b> atgtcacgtg    | No             | No          | No                               |
| chrI:6,096,169    | Random        | ZK484.7         | Exon 3/7     | agcgaactct <b>GCGCGAA</b> ggccagctgg   | No             | No          | No                               |
| chrI:6,189,643    | Random        | T05E7.3         | Exon 5/14    | aactgaaag <b>aAAACAGA</b> atattcgaac   | No             | No          | Yes                              |
| chrI:8,927,379    | Random        | N/A             |              | aaatagatg <b>gAGGGAAA</b> gctgccaata   | No             | No          | Yes                              |
| chrII:10,015,267  | Random        | <i>lec-2</i>    | Exon 2/8     | ttcctccta <b>TGTTCTT</b> caactggagc    | No             | No          | No                               |
| chrII:10,500,184  | Random        | <i>myrf-1</i>   | Exon 3/9     | ttctggcgt <b>TTCACAG</b> gggtgtcaag    | No             | No          | No                               |
| chrII:11,152,211  | Random        | <i>pqm-1</i>    | Exon 2/6     | tcaggttagg <b>GGTTCGG</b> ctgcattagg   | No             | No          | No                               |
| chrII:11,327,511  | Random        | <i>tag-180</i>  | Exon 3/18    | ttgtgtcca <b>CCATGTT</b> cgacacaaaa    | No             | No          | No                               |
| chrII:11,463,260  | Random        | <i>aars-1</i>   | Exon 3/9     | tcggtgcaag <b>GACCACA</b> cggaccagct   | Yes            | No          | No                               |
| chrII:2,068,749   | Random        | F07E5.12        | Intron 2/2   | aatcattgt <b>TTTCAGC</b> gtctgcctgg    | No             | No          | No                               |
| chrII:2,283,136   | Random        | N/A             |              | gaattgttt <b>CCCTTAC</b> cagccgtgga    | No             | No          | No                               |
| chrII:6,479,205   | Random        | <i>del-10</i>   | Exon 13/18   | aatccaattgt <b>TTTCAGC</b> gtctgcctgga | No             | No          | No                               |
| chrII:705,939     | Random        | <i>thoc-1</i>   | Intron 11/14 | agaagcttaa <b>ATAAAAG</b> tttaaatcc    | No             | No          | No                               |
| chrII:790,467     | Random        | N/A             |              | caacgattga <b>TATTCAA</b> caagaaaa     | No             | No          | No                               |
| chrII:9,327,522   | Random        | <i>eat-3</i>    | Exon 6/9     | aatgaaggct <b>CTTGGCT</b> tattcggagt   | No             | No          | No                               |
| chrIII:1,161,582  | Random        | <i>cdh-12</i>   | Intron 8/25  | tcgatgcacc <b>ATGTCCA</b> gaaactatgc   | No             | No          | No                               |
| chrIII:1,346,434  | Random        | Y82E9BL.5       | Exon 2/2     | ccgagttgt <b>GTGCATA</b> gcaggccaca    | No             | No          | No                               |
| chrIII:10,817,396 | Random        | <i>linc-129</i> | Intron 1/1   | aactatagg <b>gATGTCTC</b> gatttttgt    | No             | No          | Yes                              |
| chrIII:11,088,227 | Random        | Y69H2.24        | Intron 2/14  | caactatca <b>aGTTGACA</b> acttttga     | No             | No          | Yes                              |
| chrIII:13,191,389 | Random        | <i>gly-5</i>    | Exon 4/10    | acagttgtg <b>GGAAAAG</b> tcaagattt     | No             | No          | Yes                              |
| chrIII:2,530,847  | Random        | <i>ceh-44</i>   | Intron 2/11  | cggtgaaat <b>CGAATCA</b> aaatattgga    | No             | No          | No                               |
| chrIII:3,592,179  | Random        | <i>ptp-1</i>    | Intron 3/16  | gcgcaagtt <b>TCATATG</b> atgcatttgg    | No             | No          | No                               |
| chrIII:5,381,437  | Random        | Y32H12A.6       | Exon 2/3     | gtcgagggtg <b>TCGGCTG</b> accaccagcc   | No             | No          | No                               |
| chrIII:6,558,464  | Random        | C09E7.6         | Exon 1/18    | acaagcatca <b>GAGAATG</b> tttcgagtac   | No             | No          | No                               |
| chrIII:7,601,357  | Random        | N/A             |              | ttttggcaa <b>AAATAAT</b> tatttccgt     | No             | No          | No                               |
| chrIII:8,489,218  | Random        | <i>ess-2</i>    | Exon 4/5     | ttcaatttc <b>CGGAGTC</b> tggaaaccta    | No             | No          | No                               |
| chrIII:8,871,622  | Random        | K01F9.2         | Intron 4/5   | ttaaattctt <b>TAATTCT</b> cattatagtt   | No             | No          | No                               |

| Genome location  | Mating status | Gene name       | Location     | Sequence context                     | Micro-homology | Base repeat | Single-nucleotide micro-homology |
|------------------|---------------|-----------------|--------------|--------------------------------------|----------------|-------------|----------------------------------|
| chrIV:13,141,912 | Random        | F09E8.1         | Exon 3/6     | aagatcacac <b>CAGCCAC</b> gtatctctc  | No             | No          | No                               |
| chrIV:13,674,942 | Random        | <i>oac-48</i>   | Exon 4/12    | tgctattac <b>TGTCACA</b> ttgattcttc  | No             | No          | No                               |
| chrIV:14,620,437 | Random        | <i>dmd-6</i>    | Intron 2/4   | catccctcga <b>ATCTACG</b> aatcttgttt | Yes            | No          | Yes                              |
| chrIII:2,317,481 | Random        | <i>iffb-1</i>   | Intron 4/9   | ggattttcca <b>GGGAAAA</b> acgtgatttt | No             | No          | Yes                              |
| chrIV:15,822,650 | Random        | <i>daf-38</i>   | Intron 1/6   | cttaaagt <b>TTCAGCT</b> aagcgaacga   | No             | No          | No                               |
| chrIV:17,242,307 | Random        | N/A             |              | ttattgga <b>CTGCCCG</b> aactgaaat    | No             | No          | Yes                              |
| chrIV:2,085,223  | Random        | <i>mca-2</i>    | Exon 4/11    | ccgtactgct <b>CTCCGGC</b> actcacgcta | No             | No          | No                               |
| chrIV:3,941,695  | Random        | <i>clcc-174</i> | Intron 2/3   | tgaaaatcaa <b>CTATTAT</b> tttttaaag  | No             | No          | No                               |
| chrIV:4,373,899  | Random        | F55F10.1        | Exon 1/10    | tggtctatcg <b>ACAATCG</b> gcaaccagct | No             | No          | Yes                              |
| chrIV:4,499,173  | Random        | <i>gbb-2</i>    | Exon 10/19   | gggtgtgacc <b>ATCCTT</b> tggtgacta   | No             | No          | No                               |
| chrIV:4,884,473  | Random        | <i>str-166</i>  | Intron 1/7   | accggaagt <b>TCATTAA</b> actcagtttg  | No             | No          | No                               |
| chrIV:8,427,395  | Random        | T26A8.2         | Exon 2/7     | accgtcatc <b>AGAATGT</b> agttggtccg  | No             | No          | No                               |
| chrIV:9,998,901  | Random        | N/A             |              | ccatcaagaa <b>ACGACCA</b> tactgaaag  | No             | No          | No                               |
| chrV:10,245,171  | Random        | N/A             |              | gaaggcttg <b>AAATCCT</b> tagtcatcaag | No             | No          | No                               |
| chrV:12,820,904  | Random        | <i>ugt-18</i>   | Intron 2/7   | aacctaaacg <b>TGTTTGA</b> attgaaaag  | No             | No          | No                               |
| chrV:14,223,519  | Random        | N/A             |              | aaaagagctt <b>TTCTTGT</b> caaatgatta | No             | No          | No                               |
| chrV:14,500,230  | Random        | N/A             |              | tgtagataaa <b>GTTCTCA</b> caaagagat  | No             | No          | No                               |
| chrV:14,865,224  | Random        | <i>gcy-14</i>   | Exon 9/14    | agtcgtgtt <b>CATCGCC</b> gcaagaatat  | No             | No          | No                               |
| chrV:15,159,261  | Random        | <i>str-45</i>   | Exon 1/4     | tagttttat <b>CTGGTTA</b> atattggcat  | No             | No          | No                               |
| chrV:5,291,294   | Random        | Y69H.21         | Intron 1/4   | actggtgtc <b>GCTGTTG</b> tcttagaatt  | No             | No          | Yes                              |
| chrV:556,150     | Random        | N/A             |              | acatggttac <b>CTATAAA</b> aacttcatgt | No             | No          | No                               |
| chrV:7,621,906   | Random        | C50E3.12        | Intron 1/4   | attgtcttc <b>TAAAACA</b> ttcatgtaa   | No             | No          | No                               |
| chrX:10,671,379  | Random        | F13E6.2         | Exon 8/19    | cgctccatgt <b>GTTCTCG</b> gagggttctt | No             | No          | No                               |
| chrX:13,143,587  | Random        | N/A             |              | attcattacg <b>ATGACTA</b> ctacgggaac | Yes            | No          | No                               |
| chrX:14,333,955  | Random        | <i>sel-7</i>    | Intron 5/6   | ttattgaaaa <b>AAATAA</b> Gtttcgaagtg | No             | No          | No                               |
| chrX:17,421,426  | Random        | N/A             |              | gcgtaactc <b>CGCCCCA</b> caataccgcc  | No             | No          | Yes                              |
| chrX:3,183,429   | Random        | F56E3.10        | Exon 1/1     | agcatgcctt <b>TCTCCTC</b> ctattcccc  | No             | No          | No                               |
| chrX:5,422,338   | Random        | C41A3.1         | Intron 14/29 | aattcgaccg <b>TCCAACG</b> tccacttctt | No             | No          | No                               |
| chrX:5,517,094   | Random        | N/A             |              | gagagccata <b>GTTGCAA</b> tagttgagag | No             | No          | No                               |
| chrX:5,964,282   | Random        | R07E4.1         | Intron 6/21  | ggggtgaag <b>GGAATTT</b> ttgaaatat   | No             | No          | No                               |
| chrX:8,185,992   | Random        | C17H11.6        | Intron 16/16 | tttacttat <b>TTTACCC</b> ttgtctctg   | No             | No          | Yes                              |

**Supplemental Table S8. Genome context of randomly selected regions.**

Similar to Supplemental Table S5 but for randomly selected regions with simulated 7 bp deletion disagreement.
