# Supplementary material for: Quantification of in vivo progenitor mutation accrual with ultra-low error rate and minimal input DNA using SIP-HAVA-seq
Source: PubMed Central journal article supplement — Genome Res. 2016 Nov;26(11):1600–11. doi: 10.1101/gr.200501.115 (PMC5088601; doi:10.1101/gr.200501.115), 2016-11
Supplement: supp_gr.200501.115_Supplemental_Table_S11.pdf [file supp_gr.200501.115_Supplemental_Table_S11.pdf]

|                                                        |               |                                                |
|--------------------------------------------------------|---------------|------------------------------------------------|
| Mated expressed gene vs unmated expressed gene         | All           | (-4.047, 0.000)                                |
|                                                        | Substitutions | (-3.1917, 0.000)                               |
|                                                        | Deletions     | (-3.9309, 0.000)                               |
| Mated non-expressed gene vs unmated non-expressed gene | All           | <b>99.1% (-8.195, -0.020), p &lt; 0.036*</b>   |
|                                                        | Substitutions | (-1.6898, 2.1997)                              |
|                                                        | Deletions     | <b>99.91% (-7.032, -1.545), p &lt; 0.007**</b> |
| Mated expressed gene vs mated non-expressed gene       | All           | (-4.683, 0.556)                                |
|                                                        | Substitutions | (-1.0654, 2.5748)                              |
|                                                        | Deletions     | (-4.945, 0.281)                                |
| Unmated expressed gene vs unmated non-expressed gene   | All           | (-3.1202, 0.000)                               |
|                                                        | Substitutions | (-3.0924, 0.000)                               |
|                                                        | Deletions     | N/A                                            |

**Supplemental Table S11. Bootstrapped confidence intervals for average differences between mated vs unmated, expressed vs non-expressed mutation rates.**

Bootstrap confidence levels are 95%, or higher if indicated. Gene expression status was determined as shown in Supplemental Fig S12a. Intervals highlighted in bold do not contain zero.
