# Supplementary material for: Quantification of in vivo progenitor mutation accrual with ultra-low error rate and minimal input DNA using SIP-HAVA-seq
Source: PubMed Central journal article supplement — Genome Res. 2016 Nov;26(11):1600–11. doi: 10.1101/gr.200501.115 (PMC5088601; doi:10.1101/gr.200501.115), 2016-11
Supplement: supp_gr.200501.115_Supplemental_Table_S14.pdf [file supp_gr.200501.115_Supplemental_Table_S14.pdf]

| Mutation type | VarScan 2 mutations | Mutinack mutations detected by VarScan 2 | Mutinack Q2 duplex disagreements detected by VarScan 2 | MuTect 2 mutations | Mutinack mutations detected by MuTect 2 | Mutinack Q2 duplex disagreements detected by MuTect 2 | MuTect 1 mutations | Mutinack mutations detected by MuTect 1 | Mutinack Q2 duplex disagreements detected by MuTect 1 |
|---------------|---------------------|------------------------------------------|--------------------------------------------------------|--------------------|-----------------------------------------|-------------------------------------------------------|--------------------|-----------------------------------------|-------------------------------------------------------|
| All           | 5,451               | 5 / 17<br>[29.4%]                        | 2,286 / 15,410<br>[18.1%]                              | 35,913             | 13 / 17<br>[76.5%]                      | 2,286 / 15,410<br>[18.1%]                             | N/A                | N/A                                     | N/A                                                   |
| Substitution  | 4,901<br>[89.9%]    | 3 / 5<br>[60%]                           | 2,270 / 13,979<br>[19.5%]                              | 33,804<br>[94.1%]  | 3 / 5<br>[60%]                          | 2,270 / 13,979<br>[19.5%]                             | 10,818             | 2 / 5<br>[40%]                          | 2,019 / 13,970<br>[18.7%]                             |
| Deletion      | 395<br>[7.2%]       | 2 / 12<br>[16.7%]                        | 49 / 1,027<br>[4.8%]                                   | 1,379<br>[3.8%]    | 10 / 12<br>[83.3%]                      | 49 / 1,027<br>[4.8%]                                  | N/A                | N/A                                     | N/A                                                   |
| Insertion     | 174<br>[2.8%]       | N/A                                      | 17 / 413<br>[4.1%]                                     | 730<br>[2%]        | N/A                                     | 17 / 413<br>[4.1%]                                    | N/A                | N/A                                     | N/A                                                   |

**Supplemental Table S14. Rate of Mutinack mutation or duplex disagreement detection by VarScan 2, MuTect 2 or MuTect 1.**
