# Supplementary material for: Quantification of in vivo progenitor mutation accrual with ultra-low error rate and minimal input DNA using SIP-HAVA-seq
Source: HighWire-hosted journal article supplement (doi:10.1101/gr.200501.115), 2016-10-19
Supplement: Supplemental_Fig_S1.pdf [file Supplemental_Fig_S1.pdf]

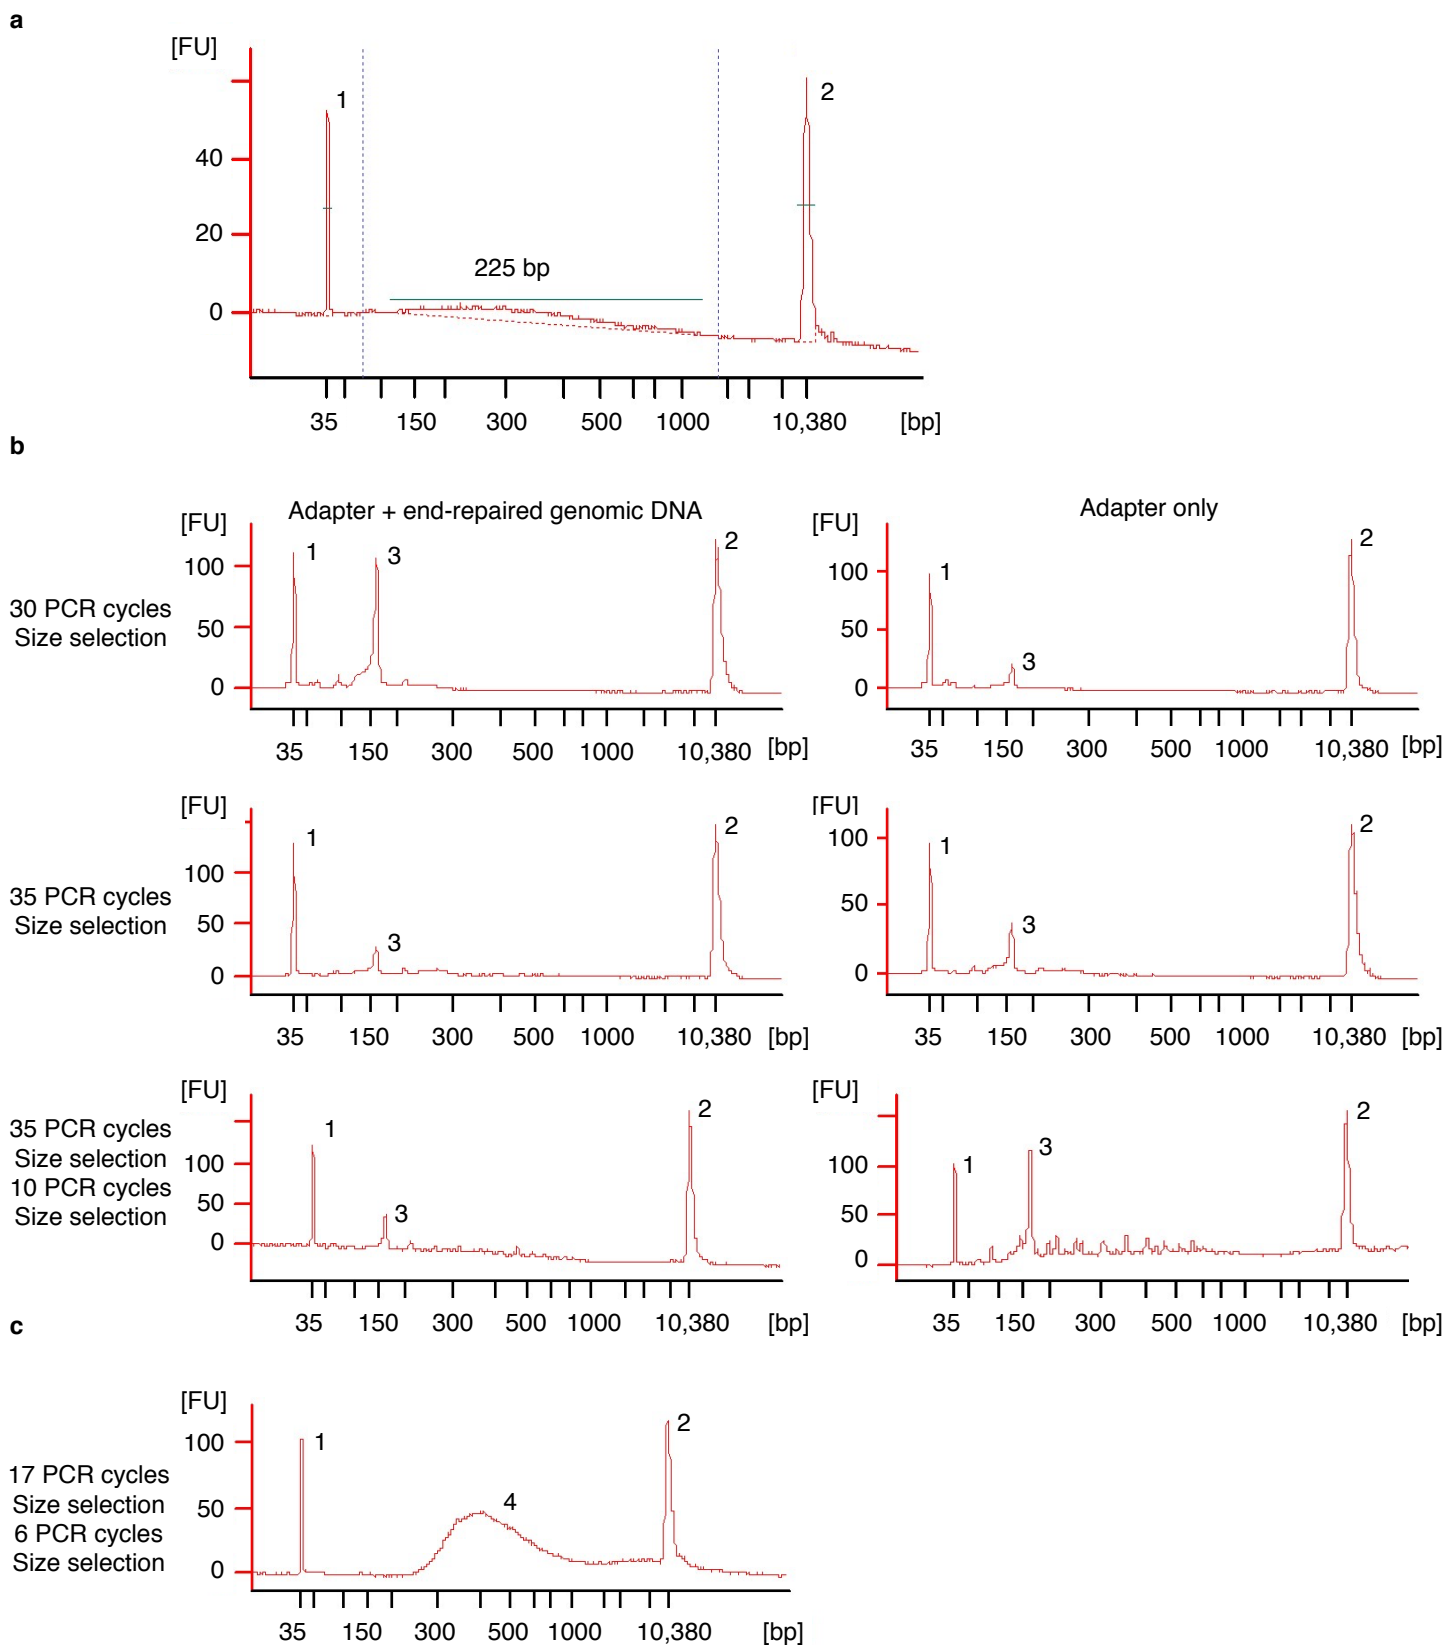

**Supplemental Fig S1. Validation of library preparation.**

(a) Bioanalyzer profile of sonicated *C. elegans* germ cell DNA (1: 35 bp marker; 2: 10,380 bp marker). (b) Bioanalyzer profiles of single MZ libraries prepared following the Schmitt et al. (2012) procedure with dA-tailing instead of dT-tailing (3: peak at expected size of adapter dimers; right column: adapter-only control). (c) Profile of a library created following our method. A peak is seen at expected size of adapter - genomic DNA ligation products (peak 4).
