# Supplementary material for: Quantification of in vivo progenitor mutation accrual with ultra-low error rate and minimal input DNA using SIP-HAVA-seq
Source: HighWire-hosted journal article supplement (doi:10.1101/gr.200501.115), 2016-10-19
Supplement: Supplemental_Fig_S6.pdf [file Supplemental_Fig_S6.pdf]

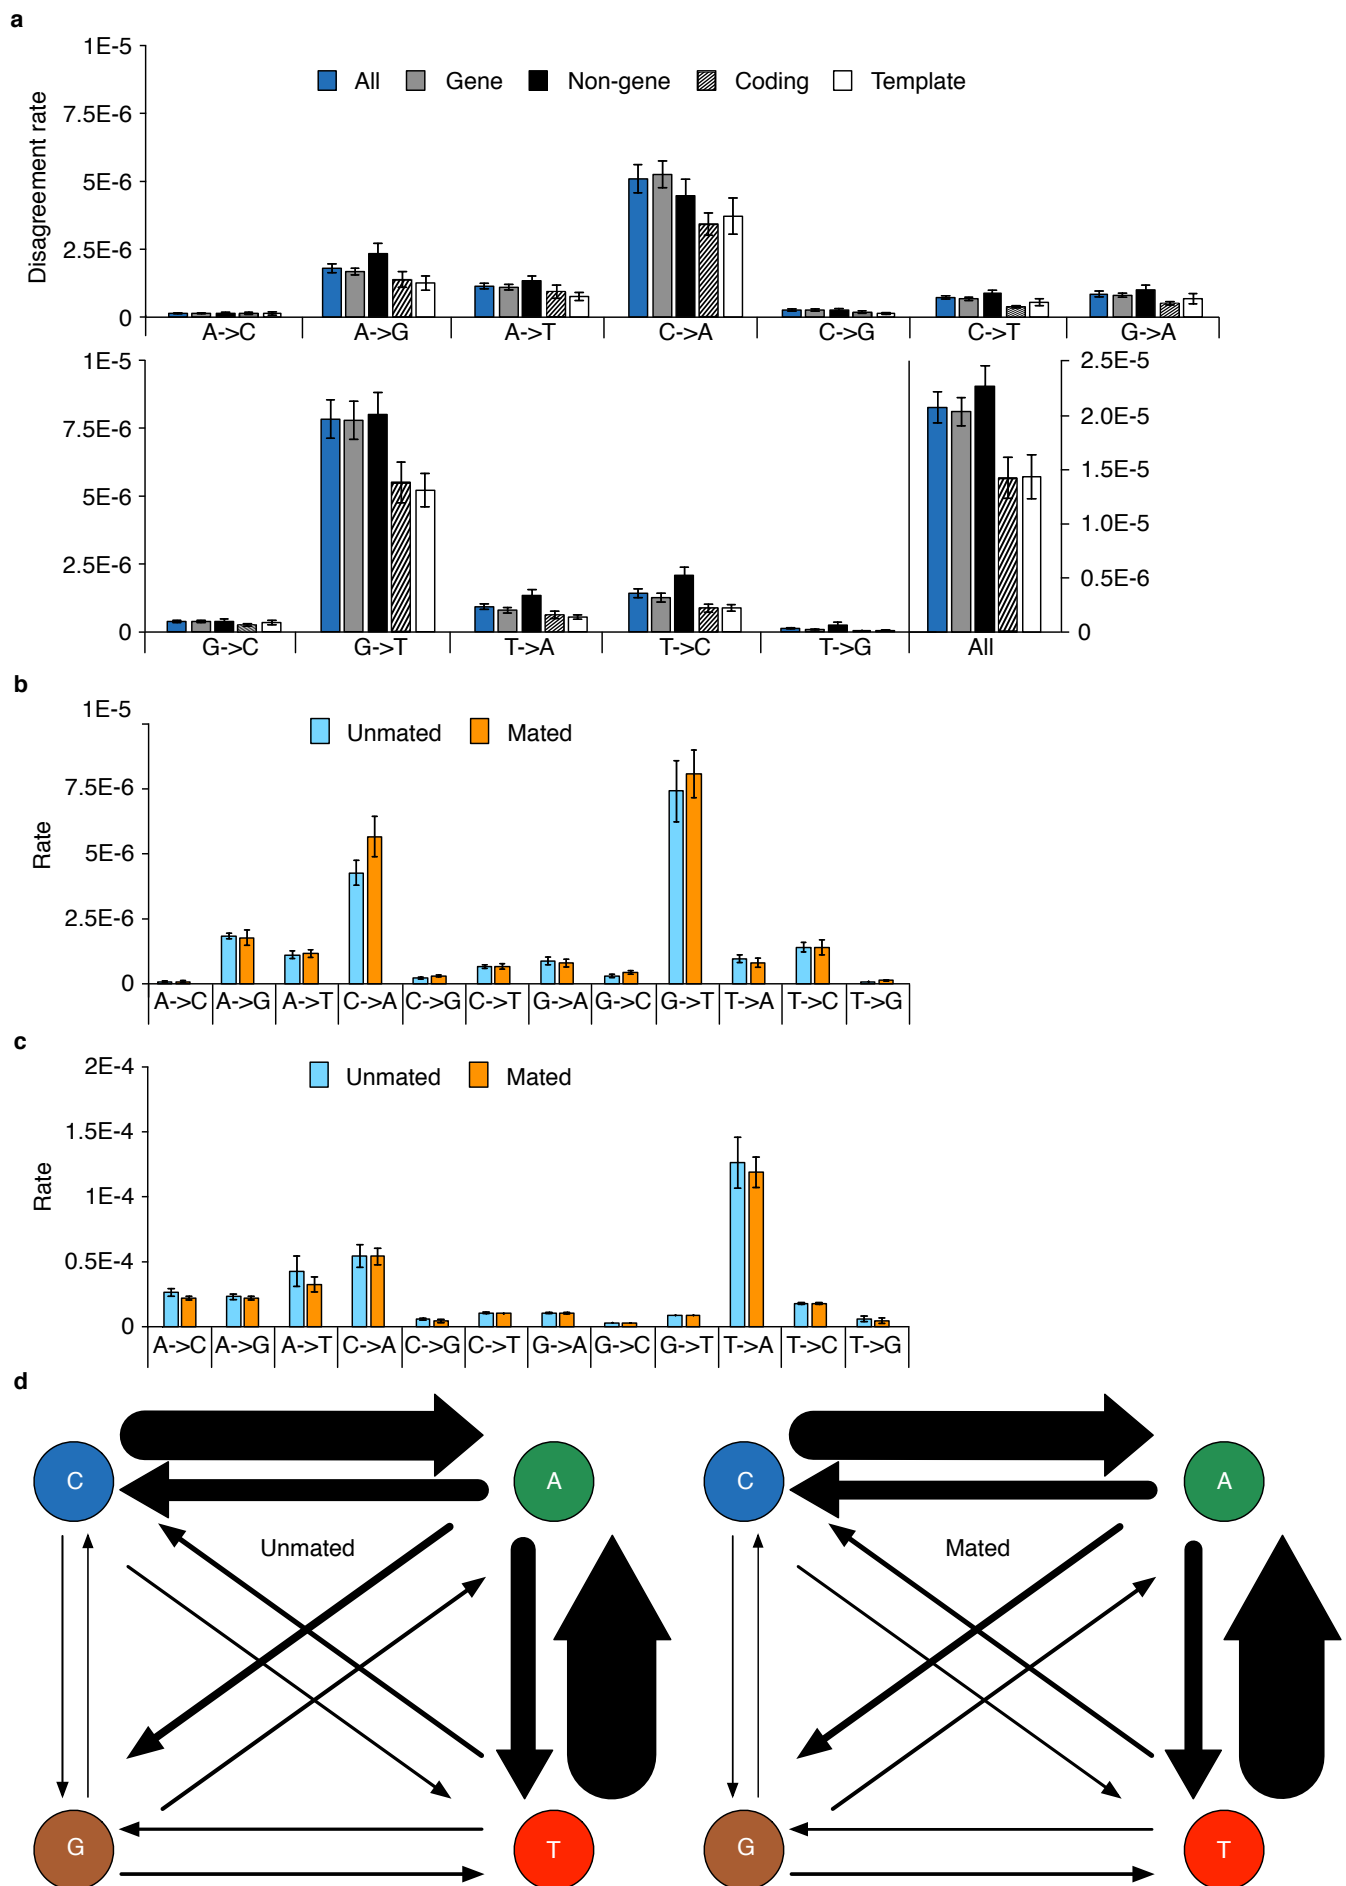

**Supplemental Fig S6. Analysis of duplex substitution disagreements, and raw Q1 or Q2 mismatches.**

(a) Duplex substitution disagreements pooled between mated and unmated samples, and broken down by genome location and coding or template strand type. (b) Distribution of duplex substitution disagreement rates as a function of mating status (see Fig 3 for ratios). (c) Distribution of raw Q2 substitution mismatch rates as a function of mating status. (d) Raw Q1 substitution mismatch spectra (compare to Supplemental Fig S7a-b).
