# Supplementary material for: Quantification of in vivo progenitor mutation accrual with ultra-low error rate and minimal input DNA using SIP-HAVA-seq
Source: HighWire-hosted journal article supplement (doi:10.1101/gr.200501.115), 2016-10-19
Supplement: Supplemental_Fig_S7.pdf [file Supplemental_Fig_S7.pdf]

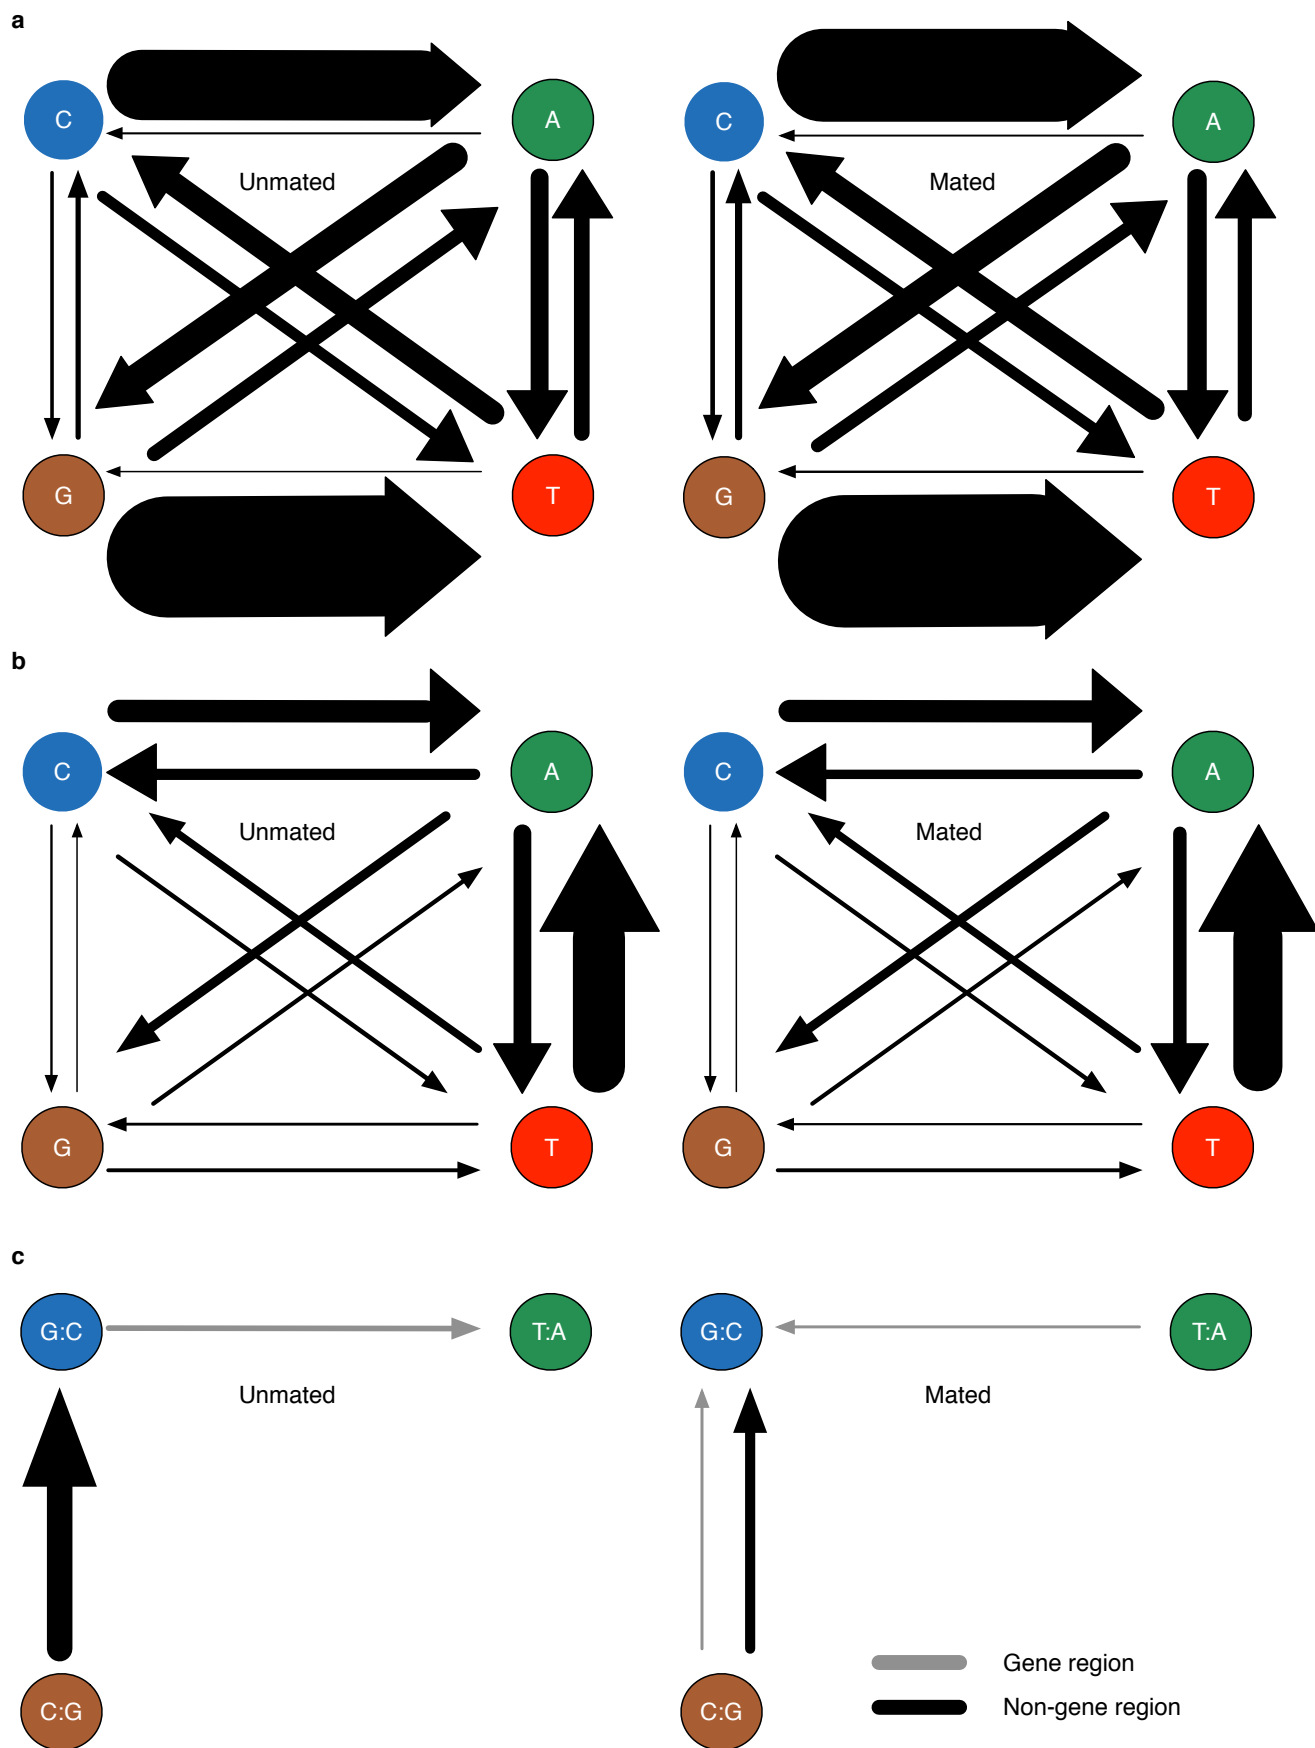

**Supplemental Fig S7. Spectra of substitution disagreements and mismatches, and of substitutions.**  
 (a-c) Duplex substitution disagreement (a), raw Q2 substitution mismatch (b), or substitution (c) spectra. Arrow thickness is proportional to the rate of corresponding substitution.
