# Supplementary material for: Quantification of in vivo progenitor mutation accrual with ultra-low error rate and minimal input DNA using SIP-HAVA-seq
Source: HighWire-hosted journal article supplement (doi:10.1101/gr.200501.115), 2016-10-19
Supplement: Supplemental_Fig_S10.pdf [file Supplemental_Fig_S10.pdf]

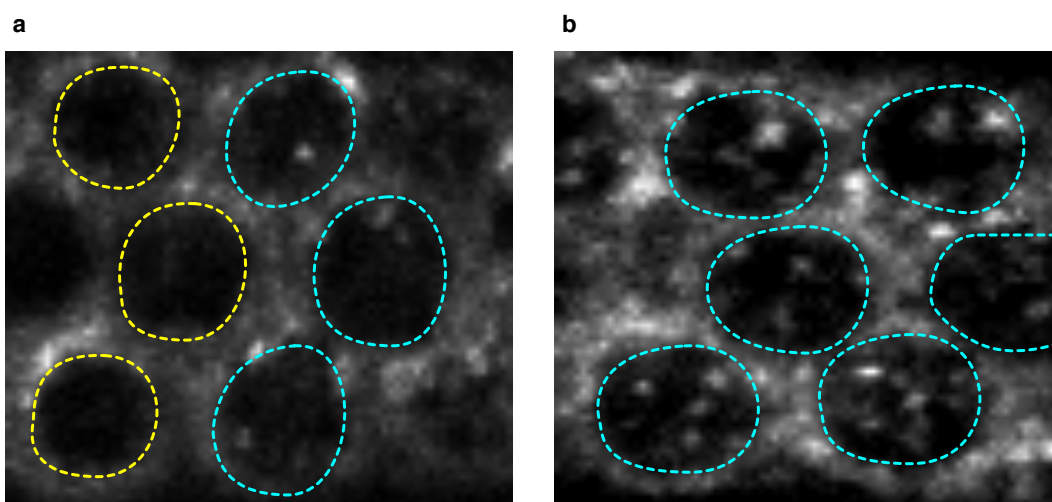

**Supplemental Fig S10. Comparison of 8-oxoguanine prevalence in mated and unmated MZs.**  
(**a-b**) Representative images from unmated (a) and mated (b) MZs. Cells with foci are outlined in yellow and those without are outlined in cyan.
