# Supplementary material for: Quantification of in vivo progenitor mutation accrual with ultra-low error rate and minimal input DNA using SIP-HAVA-seq
Source: HighWire-hosted journal article supplement (doi:10.1101/gr.200501.115), 2016-10-19
Supplement: Supplemental_Fig_S11.pdf [file Supplemental_Fig_S11.pdf]

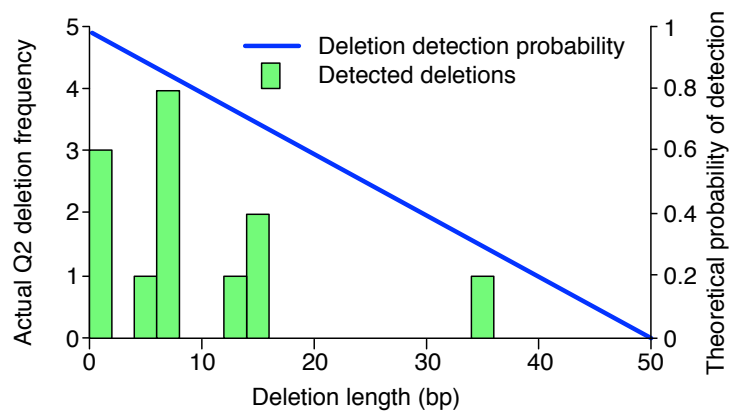

**Supplemental Fig S11. Distribution of deletion lengths.**  
Overlay shows detection probability of a deletion as a function of its length, assuming 150 bp reads.
