# Supplementary material for: Quantification of in vivo progenitor mutation accrual with ultra-low error rate and minimal input DNA using SIP-HAVA-seq
Source: HighWire-hosted journal article supplement (doi:10.1101/gr.200501.115), 2016-10-19
Supplement: Supplemental_Fig_S13.pdf [file Supplemental_Fig_S13.pdf]

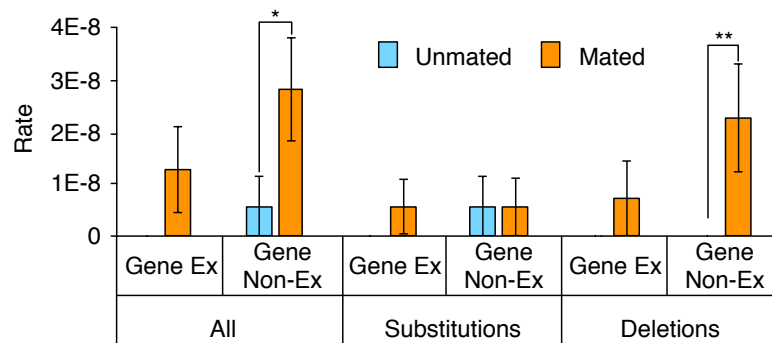

**Supplemental Fig S13. Mutation rates as a function of gene expression.**

Gene mutation rates broken down by thresholded gene expression status. Error bars give SEM, while stars denote significance of pairwise differences computed using bootstrapped confidence intervals (\*:  $p < 0.05$ ; \*\*:  $p < 0.01$ ; \*\*\*:  $p < 0.001$ ), with p-values corrected using the Bonferroni procedure.
