# Supplementary material for: Quantification of in vivo progenitor mutation accrual with ultra-low error rate and minimal input DNA using SIP-HAVA-seq
Source: HighWire-hosted journal article supplement (doi:10.1101/gr.200501.115), 2016-10-19
Supplement: Supplemental_Fig_S16.pdf [file Supplemental_Fig_S16.pdf]

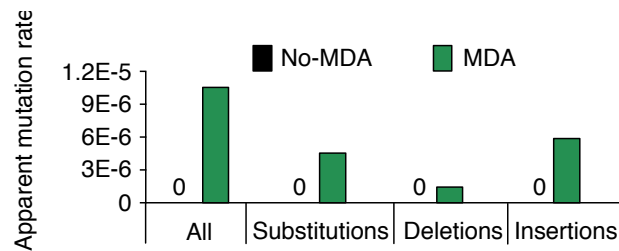

**Supplemental Fig S16. Apparent mutation rates in library prepared with or without MDA step before adapter ligation.**

No mutations were detected in no-MDA sample despite deeper sequencing than for the MDA sample ( $5.33 \times 10^7$  positions meeting Q2 criteria vs  $9 \times 10^5$ , respectively).
