# Supplementary material for: Quantification of in vivo progenitor mutation accrual with ultra-low error rate and minimal input DNA using SIP-HAVA-seq
Source: HighWire-hosted journal article supplement (doi:10.1101/gr.200501.115), 2016-10-19
Supplement: Supplemental_Fig_S17.pdf [file Supplemental_Fig_S17.pdf]

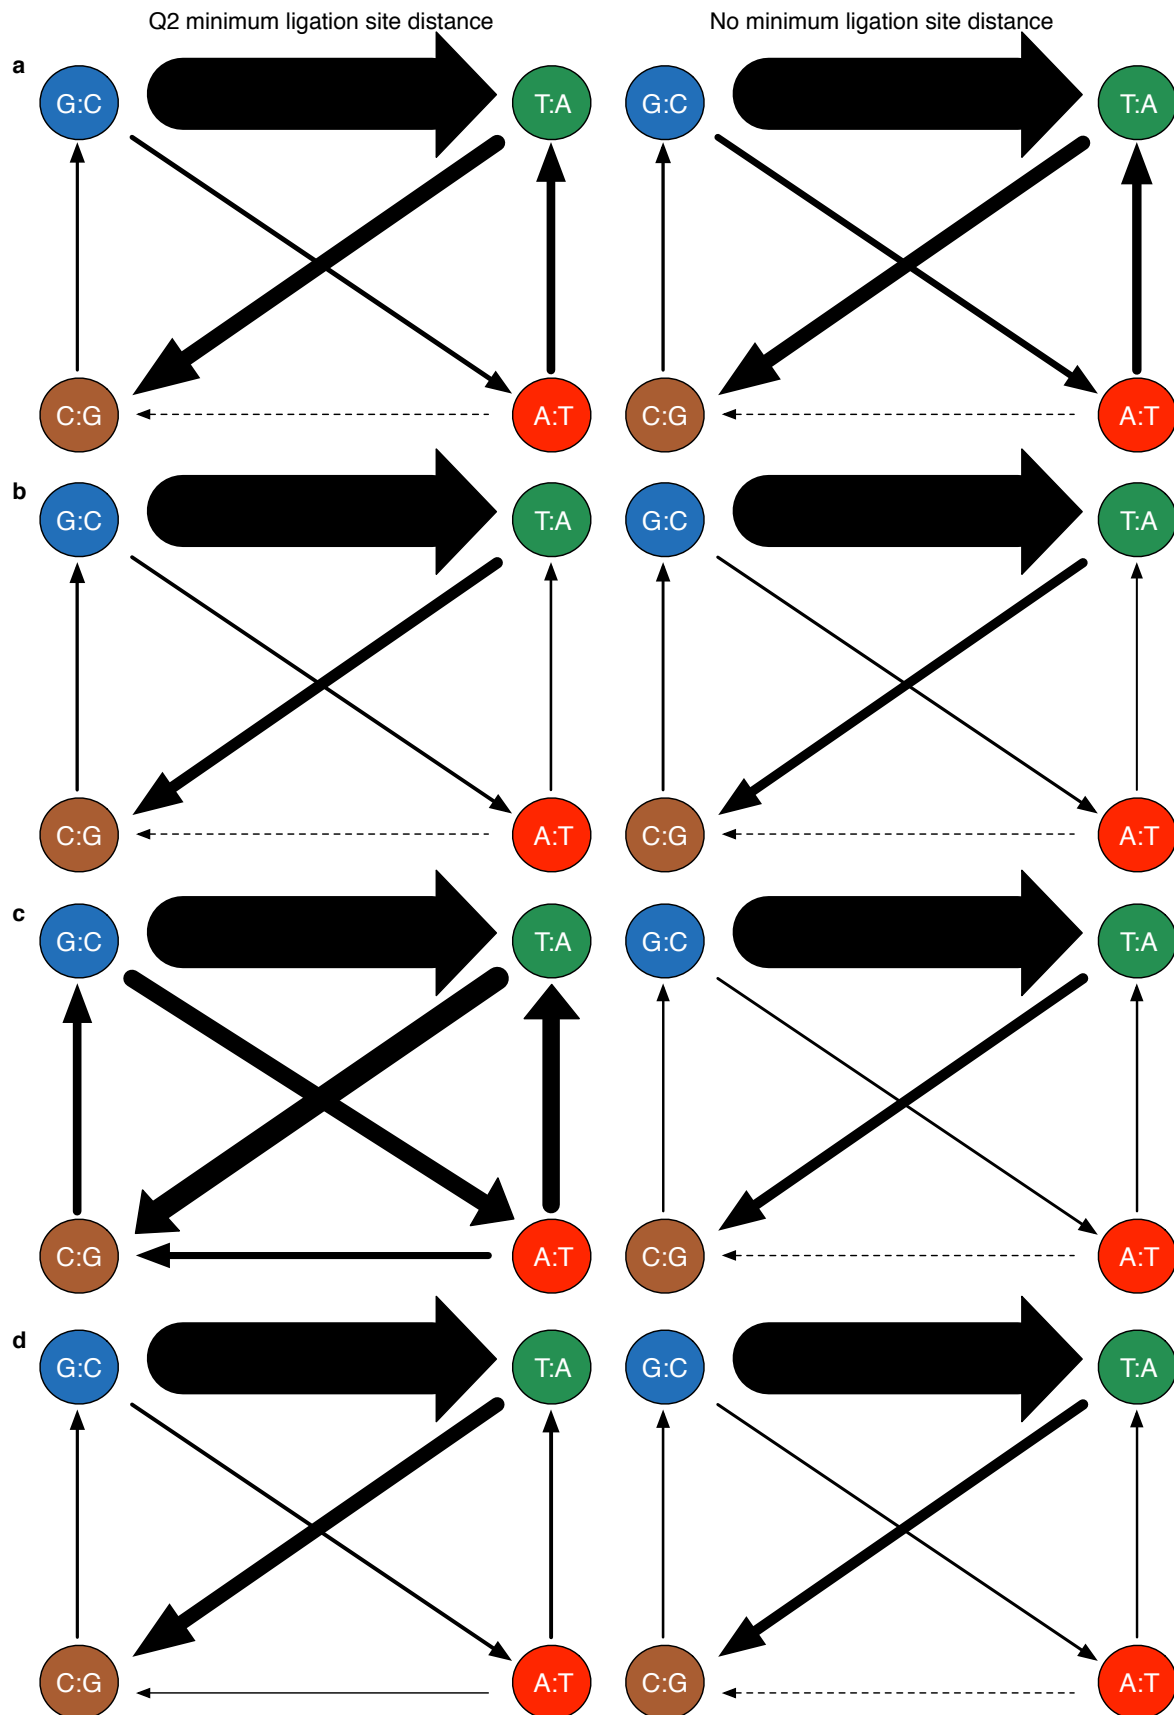

**Supplemental Fig S17. Comparison of Mutinack duplex substitution disagreement spectra and VarScan 2, MuTect 1, or MuTect 2 mutation spectra.**

Disagreement spectra (a) are the same as shown in Supplemental Fig S7a except for collapsing that allows for comparison with VarScan 2 (b), MuTect 1 (c), or MuTect 2 (d) spectra; left column: filtering based on distance to ligation site, right column: no filtering.
