# Supplementary material for: Quantification of in vivo progenitor mutation accrual with ultra-low error rate and minimal input DNA using SIP-HAVA-seq
Source: HighWire-hosted journal article supplement (doi:10.1101/gr.200501.115), 2016-10-19
Supplement: Supplemental_Table_S1.pdf [file Supplemental_Table_S1.pdf]

| Threshold                                                       | Q1  | Q2   |
|-----------------------------------------------------------------|-----|------|
| Minimum reads for top strand and for bottom strand              | 0   | 3    |
| Minimum BWA-MEM mapping quality                                 | 20  | 50   |
| Maximum duplex clipping (bp)                                    | 0   | 15   |
| Minimum base consensus                                          | 51% | 95%  |
| Maximum insert size (bp)                                        | NA  | 1000 |
| Minimum distance from read base to adapter ligation site (bp)   | 3   | 35   |
| Minimum distance to read end (bp)                               | 0   | 4    |
| Minimum base Phred score                                        | 20  | 30   |
| Minimum Q1/Q2 duplex coverage at same position in sister sample | 0   | 10   |

**Supplemental Table S1. Quality thresholds for mutation calling.**

For a *bona fide*, *de novo* mutation candidate to be reported it must meet Q2 thresholds, and wildtype candidates in the sister sample must meet at least Q1 thresholds. Note that the value of 0 for the Q1 threshold in the first row means that a candidate can reach Q1 status even if all of its reads come from the same strand (instead of being contributed by both the top and bottom strands).
