# Supplementary material for: Quantification of in vivo progenitor mutation accrual with ultra-low error rate and minimal input DNA using SIP-HAVA-seq
Source: HighWire-hosted journal article supplement (doi:10.1101/gr.200501.115), 2016-10-19
Supplement: Supplemental_Table_S3.pdf [file Supplemental_Table_S3.pdf]

|                      | Substitutions  | Deletions     | Insertions    |
|----------------------|----------------|---------------|---------------|
| Duplex disagreements | 2.1E-5 [90.7%] | 1.7E-6 [6.7%] | 5.4E-7 [2.6%] |
| Raw Q2 disagreements | 3.3E-4 [92.3%] | 1.6E-5 [4.6%] | 1.0E-5 [3.1%] |
| Raw Q1 disagreements | 1.6E-3 [95.9%] | 3.9E-5 [2.4%] | 2.8E-5 [1.7%] |

**Supplemental Table S3. Disagreement and mismatch type distribution.**
