# Supplementary material for: Quantification of in vivo progenitor mutation accrual with ultra-low error rate and minimal input DNA using SIP-HAVA-seq
Source: HighWire-hosted journal article supplement (doi:10.1101/gr.200501.115), 2016-10-19
Supplement: Supplemental_Table_S9.pdf [file Supplemental_Table_S9.pdf]

| Type                           | Microhomology               | Single-nucleotide microhomology | Base repeat (> 6n)           |
|--------------------------------|-----------------------------|---------------------------------|------------------------------|
| Deletions                      | 1/12 [8.3%] p = 1           | 3/12 [25%] p = 1                | 0/12 [0%] p = 1              |
| Deletion disagreements > 3 bp  | 15/47 [31.9%] p < 2.1E-3**  | 14/47 [29.8%] p > 0.26          | 3/47 [6.4%] p > 0.26         |
| Deletion disagreements < 3 bp  | 8/50 [16%] p > 0.22         | 20/50 [40%] p > 0.13            | 13/50 [26%] p < 7.9E-5***    |
| Insertion disagreements < 3 bp | 17/30 [56.7%] p < 8.4E-8*** | 25/30 [83.3%] p < 1.9E-8***     | 22/30 [73.3%] p < 3.3E-14*** |
| Random location                | 3/60 [5%]                   | 12/60 [20%]                     | 0/60 [0%]                    |

**Supplemental Table S9. Microhomology and homopolymers around deletions and duplex indel disagreements.**

Data derived from Supplemental Tables S5-8. Stars indicate significance of p-values for comparison with “random location” row, computed with Fisher’s exact test and corrected with Hochberg’s step-up procedure (5% false discovery rate); \*: p < 0.05; \*\*: p < 0.01; \*\*\*: p < 0.001.
