# Supplementary material for: Quantification of in vivo progenitor mutation accrual with ultra-low error rate and minimal input DNA using SIP-HAVA-seq
Source: HighWire-hosted journal article supplement (doi:10.1101/gr.200501.115), 2016-10-19
Supplement: Supplemental_Table_S10.pdf [file Supplemental_Table_S10.pdf]

| Type                           | Microhomology (gene) | Microhomology (non-gene) | p-value (gene vs non-gene) |
|--------------------------------|----------------------|--------------------------|----------------------------|
| Deletions                      | 1/8 [12.5%]          | 0/4 [0%]                 | 1                          |
| Deletion disagreements > 3 bp  | 8/32 [25%]           | 7/15 [46.7%]             | > 0.55                     |
| Deletion disagreements < 3 bp  | 5/34 [14.7%]         | 3/16 [18.8%]             | 1                          |
| Insertion disagreements < 3 bp | 10/20 [50%]          | 7/10 [70%]               | > 0.44                     |
| Random location                | 2/47 [4.2%]          | 4/13 [30.8%]             | N/A                        |

**Supplemental Table S10. Comparison of microhomology frequency around deletions and duplex indel disagreements, for gene regions and non-gene regions.**

Data analysis as in Supplemental Table S9.
