# Supplementary material for: Quantification of in vivo progenitor mutation accrual with ultra-low error rate and minimal input DNA using SIP-HAVA-seq
Source: HighWire-hosted journal article supplement (doi:10.1101/gr.200501.115), 2016-10-19
Supplement: Supplemental_Table_S12.pdf [file Supplemental_Table_S12.pdf]

| Mating status | Gene name     | Deletion disagreement length (bp) | FPKM   |
|---------------|---------------|-----------------------------------|--------|
| Mated         | H12D21.6      | 4                                 | 0.00   |
| Mated         | <i>vit-1</i>  | 4                                 | 4.49   |
| Mated         | <i>cand-1</i> | 4                                 | 92.47  |
| Mated         | <i>scrm-5</i> | 4                                 | 0.00   |
| Mated         | <i>alh-1</i>  | 23                                | 220.58 |
| Mated         | <i>abu-11</i> | 4                                 | 0.00   |
| Mated         | F41E6.15      | 4                                 | 0.00   |
| Mated         | <i>gly-11</i> | 7                                 | 0.00   |
| Mated         | <i>phf-10</i> | 8                                 | 65.65  |
| Mated         | C31G12.4      | 6                                 | 0.00   |
| Mated         | <i>trr-1</i>  | 7                                 | 23.18  |
| Mated         | F53A10.2      | 19                                | 0.00   |
| Unmated       | B0205.1       | 4                                 | 42.27  |
| Mated         | F56C11.6      | 10                                | 0.26   |
| Mated         | <i>rha-1</i>  | 6                                 | 74.41  |
| Mated         | <i>srw-35</i> | 5                                 | 0.00   |
| Unmated       | F49C5.4       | 6                                 | 0.00   |
| Mated         | F14D1.2       | 49                                | 0.00   |
| Mated         | R04E5.8       | 11                                | 2.00   |
| Mated         | Y47H9C.20     | 15                                | 0.00   |
| Mated         | <i>lgc-35</i> | 11                                | 0.00   |
| Mated         | ZC123.10      | 4                                 | 0.00   |

**Supplemental Table S12. Germline expression levels at loci of duplex deletion disagreements longer than 3 bp and at loci of deletions (selecting disagreements that fall in gene regions).**
