# Supplementary figures and images for: Quantification of in vivo progenitor mutation accrual with ultra-low error rate and minimal input DNA using SIP-HAVA-seq
Source: HighWire-hosted journal article supplement (doi:10.1101/gr.200501.115), 2016-10-19

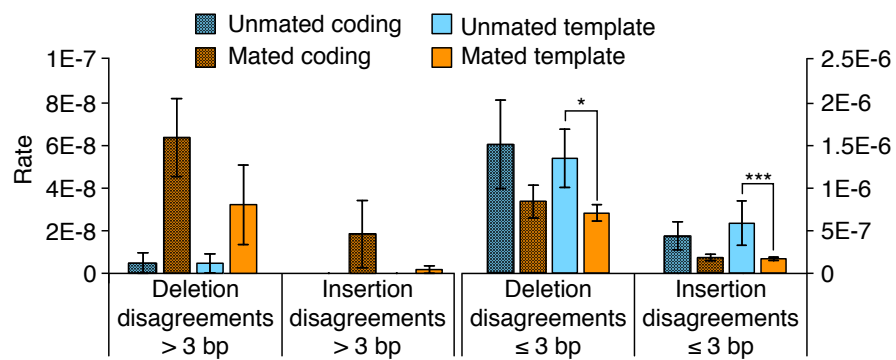

**Supplemental Fig S23. Duplex indel disagreements broken down by length and strand type.**

Supplement: Supplemental_Fig_S23.pdf [file Supplemental_Fig_S23.pdf]

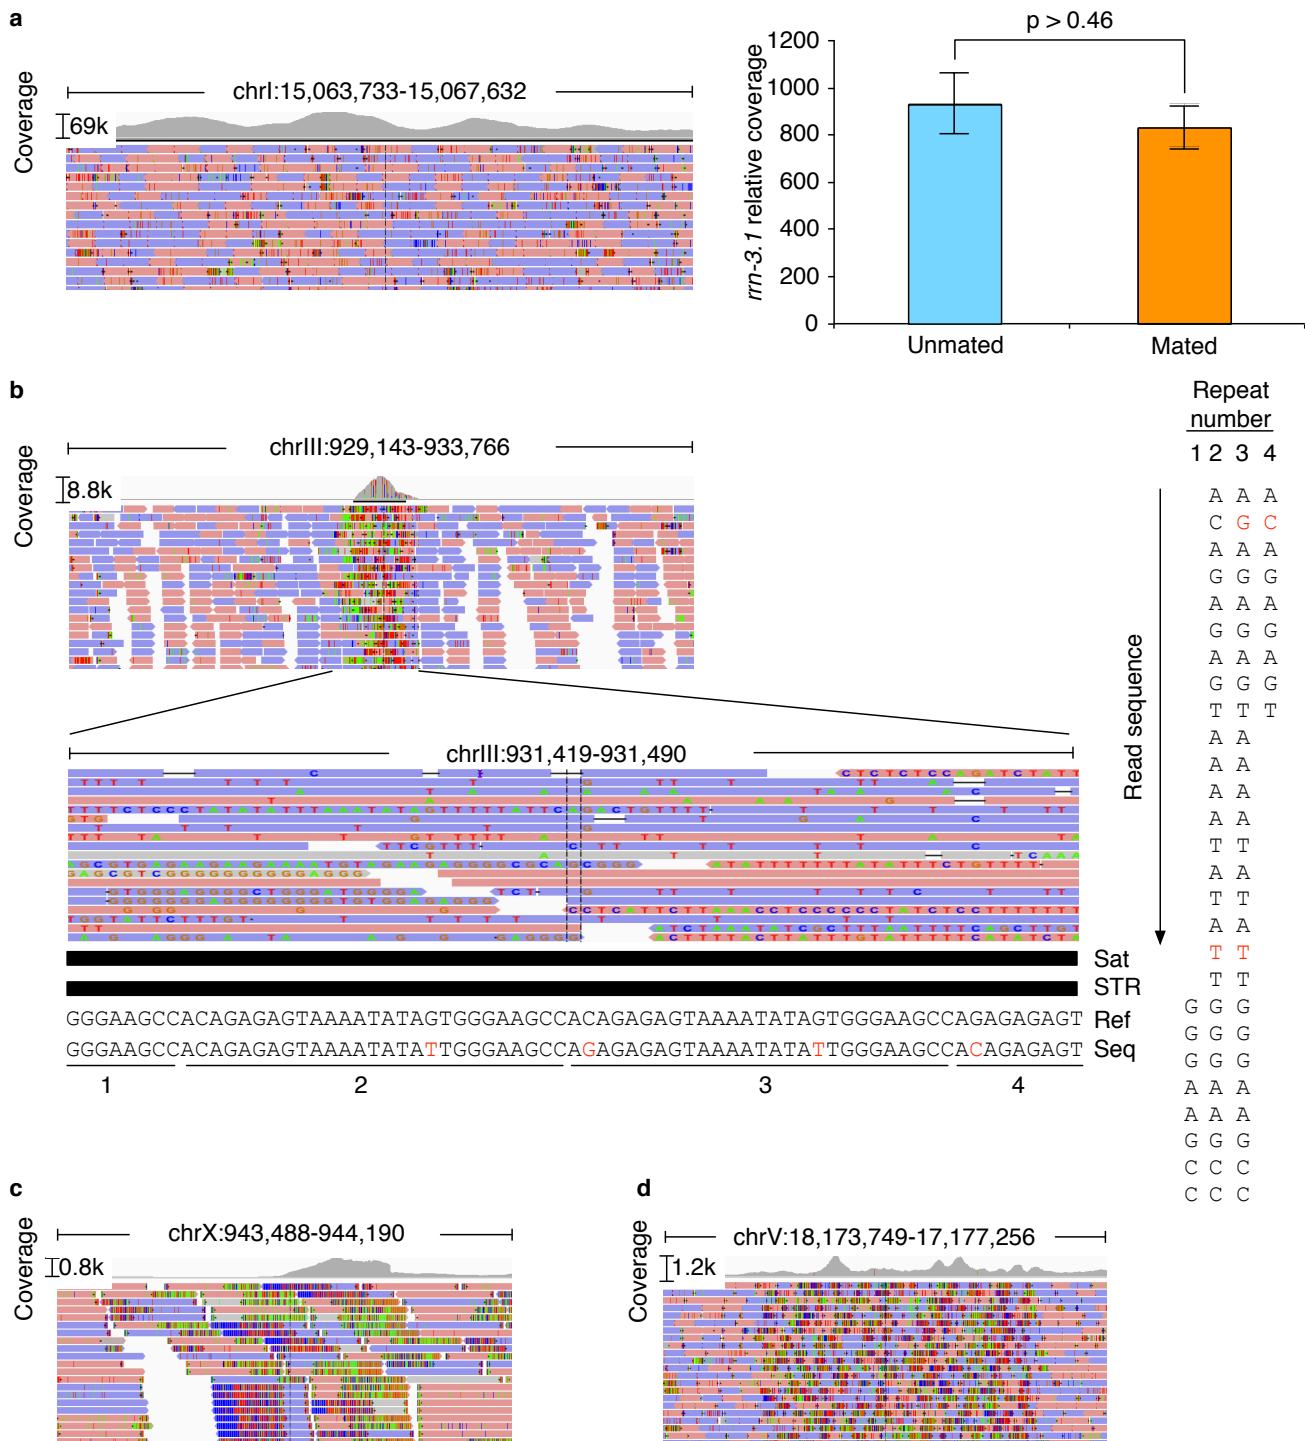

Supplement: Supplemental_Fig_S3.pdf [file Supplemental_Fig_S3.pdf]
